# Supplementary material
Source: publisher figshare collection journal article supplement (https://sage.figshare.com/ndownloader/files/22849685)
Supplement: Supplementary file 1 [file 22849685]

## Supplementary materials: Symptom prevalence table

| N° Items | Groups  | No problem |       |       |       |       | Severe problem | Summ % option 1-5 | Order descending sum option 1 to 5 |
|----------|---------|------------|-------|-------|-------|-------|----------------|-------------------|------------------------------------|
|          |         | 0          | 1     | 2     | 3     | 4     | 5              |                   |                                    |
| RSI 1    | Control | 57.7%      | 16.9% | 15.5% | 8.5%  | 1.4%  | .0%            | 42.3%             | 3•                                 |
|          | Case    | 23.2%      | 14.3% | 8.9%  | 25.0% | 5.4%  | 23.2%          | 76.8%             |                                    |
|          | Total   | 42.5%      | 15.7% | 12.6% | 15.7% | 3.1%  | 10.2%          | 57.5%             |                                    |
| RSI 2    | Control | 38.0%      | 35.2% | 15.5% | 5.6%  | 5.6%  | .0%            | 62.0%             | 1•                                 |
|          | Case    | 5.4%       | 7.1%  | 12.5% | 32.1% | 23.2% | 19.6%          | 94.6%             |                                    |
|          | Total   | 23.6%      | 22.8% | 14.2% | 17.3% | 13.4% | 8.7%           | 76.4%             |                                    |
| RSI 3    | Control | 60.6%      | 19.7% | 12.7% | 4.2%  | 2.8%  | .0%            | 39.4%             | 4•                                 |
|          | Case    | 23.2%      | 23.2% | 17.9% | 12.5% | 12.5% | 10.7%          | 76.8%             |                                    |
|          | Total   | 44.1%      | 21.3% | 15.0% | 7.9%  | 7.1%  | 4.7%           | 55.9%             |                                    |
| RSI 4    | Control | 84.5%      | 5.6%  | 5.6%  | .0%   | 4.2%  | .0%            | 15.5%             | 9•                                 |
|          | Case    | 62.5%      | 7.1%  | 12.5% | 3.6%  | 8.9%  | 5.4%           | 37.5%             |                                    |
|          | Total   | 74.8%      | 6.3%  | 8.7%  | 1.6%  | 6.3%  | 2.4%           | 25.2%             |                                    |
| RSI 5    | Control | 87.3%      | 9.9%  | 2.8%  | .0%   | .0%   | .0%            | 12.7%             | 7•                                 |
|          | Case    | 41.1%      | 8.9%  | 14.3% | 8.9%  | 17.9% | 8.9%           | 58.9%             |                                    |
|          | Total   | 66.9%      | 9.4%  | 7.9%  | 3.9%  | 7.9%  | 3.9%           | 33.1%             |                                    |
| RSI 6    | Control | 78.9%      | 8.5%  | 7.0%  | 4.2%  | .0%   | 1.4%           | 21.1%             | 8•                                 |
|          | Case    | 55.4%      | 12.5% | 12.5% | 8.9%  | 3.6%  | 7.1%           | 44.6%             |                                    |
|          | Total   | 68.5%      | 10.2% | 9.4%  | 6.3%  | 1.6%  | 3.9%           | 31.5%             |                                    |
| RSI 7    | Control | 57.7%      | 22.5% | 12.7% | 2.8%  | 2.8%  | 1.4%           | 42.3%             | 5•                                 |
|          | Case    | 26.8%      | 14.3% | 14.3% | 21.4% | 14.3% | 8.9%           | 73.2%             |                                    |
|          | Total   | 44.1%      | 18.9% | 13.4% | 11.0% | 7.9%  | 4.7%           | 55.9%             |                                    |
| RSI 8    | Control | 71.8%      | 14.1% | 7.0%  | 7.0%  | .0%   | .0%            | 28.2%             | 6•                                 |
|          | Case    | 32.1%      | 14.3% | 16.1% | 10.7% | 8.9%  | 17.9%          | 67.9%             |                                    |
|          | Total   | 54.3%      | 14.2% | 11.0% | 8.7%  | 3.9%  | 7.9%           | 45.7%             |                                    |
| RSI 9    | Control | 53.5%      | 25.4% | 11.3% | 8.5%  | 1.4%  | .0%            | 46.5%             | 2•                                 |
|          | Case    | 16.1%      | 8.9%  | 17.9% | 17.9% | 21.4% | 17.9%          | 83.9%             |                                    |
|          | Total   | 37.0%      | 18.1% | 14.2% | 12.6% | 10.2% | 7.9%           | 63.0%             |                                    |
